# Supplementary material for: Catalytic hydrothermal deoxygenation of lipids and fatty acids to diesel-like hydrocarbons: a review
Source: Royal Society of Chemistry journal article supplement (doi:10.1039/d0gc03707a), 2021-01-01
Supplement: d0gc03707a1.pdf [file d0gc03707a1.pdf]

*Supplementary Material for*

**Catalytic hydrothermal deoxygenation of lipids and fatty acids to  
diesel-like hydrocarbons: A review**

Xiaoyi Yao,<sup>a</sup> Timothy J. Strathmann,<sup>b</sup> Yalin Li,<sup>c</sup> Lauren E. Cronmiller,<sup>b</sup> Huiling Ma<sup>a</sup>  
and Jing Zhang<sup>\*a</sup>

<sup>a</sup> Key Laboratory of the Three Gorges Reservoir Region's Eco-Environment, Ministry of Education, College of Environment and Ecology, Chongqing University, Chongqing 400045, PR China.

<sup>b</sup> Department of Civil and Environmental Engineering, Colorado School of Mines, 1500 Illinois Street, Golden, Colorado 80401, United States.

<sup>c</sup> Institute of Sustainability, Energy, and Environment, University of Illinois at Urbana-Champaign, 1101 W. Peabody Drive, Urbana, IL 61801 United States.

E-mail:

Xiaoyi Yao: [yaoxiaoyi@cqu.edu.cn](mailto:yaoxiaoyi@cqu.edu.cn);

Timothy J. Strathmann: [strthmnn@mines.edu](mailto:strthmnn@mines.edu);

Yalin Li: [yalinli2@illinois.edu](mailto:yalinli2@illinois.edu)

Lauren E. Cronmiller: [lcronmiller@mymail.mines.edu](mailto:lcronmiller@mymail.mines.edu)

Huiling Ma: [mahuiling2020@163.com](mailto:mahuiling2020@163.com);

Jing Zhang: [zhangjing2018@cqu.edu.cn](mailto:zhangjing2018@cqu.edu.cn)

\*Corresponding author. College of Environment and Ecology, Chongqing University, Chongqing, China.

E-mail: [zhangjing2018@cqu.edu.cn](mailto:zhangjing2018@cqu.edu.cn); Tel: +86-15050556980 (Zhang Jing)

**This file includes:**

Text S1 and Tables S1 to S7

## Contents

|                                                                                                                              |    |
|------------------------------------------------------------------------------------------------------------------------------|----|
| Text S1 Definition of conversion and selectivity in the SI .....                                                             | 3  |
| Table S1. Pentadecane yields from palmitic acid after HTDO with different homogeneous catalyst at 370 °C <sup>S1</sup> ..... | 4  |
| Table S2. HTDO process of fatty acids involving AC as catalyst .....                                                         | 5  |
| Table S3. HTDO process of lipids and fatty acids involving Pd-based catalyst.....                                            | 6  |
| Table S4. HTDO process of lipids and fatty acids involving Pt-based catalyst .....                                           | 9  |
| Table S5. HTDO process of lipids and fatty acids involving Ru-based catalyst .....                                           | 13 |
| Table S6. HTDO process of lipids and fatty acids involving Ni-based catalyst.....                                            | 16 |
| Table S7. HTDO process of lipids and fatty acids over other catalysts.....                                                   | 20 |

## Text S1 Definition of conversion and selectivity in the SI

In the following Tables, the conversion was calculated as mole percent, as shown in eq. S1:

$$\text{Conversion (mol\%)} = \left(1 - \frac{n(\text{feedstock after reaction})}{n(\text{feedstock before reaction})}\right) \times 100\% \quad (\text{S1})$$

Hydrocarbon yields are divided into three categories, namely mass yield, molar yield and carbon mass/mole yield. For greater clarity, wt%, mol% and C% are used to refer to them respectively. The mass yield was calculated by weight percent (eq. S2):

$$\text{Mass yield (wt\%)} = \frac{\sum m(\text{product})}{m(\text{feedstock})} \times 100\%$$

(S2)

The molar yield was calculated by mole percent (eq. S3):

$$\text{Molar yield (\%)} = \frac{\sum n(\text{product})}{n(\text{feedstock})} \times 100\% \quad (\text{S3})$$

The carbon mass/molar yield was calculated based on the eq. S4:

$$\text{Carbon mass/molar yield (C\%)} = \frac{\sum n(\text{carbon in products})}{n(\text{total carbon in feedstocks})} \times 100\%$$

(S4)

The selectivity of products is also divided into three categories, namely mass selectivity, molar selectivity and carbon mass/mole selectivity. For greater clarity, wt%, mol% and C% are used to refer to them respectively. The mass selectivity was calculated by weight percent (eq. S5):

$$\text{Mass selectivity (wt\%)} = \frac{m(\text{product})}{m(\text{total products})} \times 100\% \quad (\text{S5})$$

The molar selectivity was calculated based on the eq. 21:

$$\text{Molar Selectivity (mol\%)} = \frac{n(\text{product})}{n(\text{total products})} \times 100\% \quad (\text{S6})$$

The carbon mass/molar selectivity was calculated based on the eq.23:

$$\text{Carbon mass/molar Selectivity (C\%)} = \frac{n(\text{carbon in product})}{n(\text{total carbon in products})} \times 100\% \quad (\text{S7})$$

**Table S1.** Pentadecane yields from palmitic acid after HTDO with different homogeneous catalyst at 370 °C <sup>S1</sup> .

| Catalyst          | Catalyst loading/mg | Time/h | Molar yield (mol%) |
|-------------------|---------------------|--------|--------------------|
| None              | —                   | 17     | 0.67               |
| NaCl              | 2.5                 | 17     | 1.3                |
| MnCl <sub>2</sub> | 5.4                 | 17     | 0.77               |
| ZnCl <sub>2</sub> | 5.9                 | 17     | 0.99               |
| CoCl <sub>2</sub> | 5.6                 | 17     | 2.1                |
| CoCl <sub>2</sub> | 50                  | 18     | 6.6                |
| CuSO <sub>4</sub> | 6.9                 | 17     | 1.8                |
| MgSO <sub>4</sub> | 5.2                 | 17     | 1.1                |
| NaOH              | 3.9                 | 18     | 7.1                |
| KOH               | 5.5                 | 18     | 5.5                |

**Table S2.** HTDO process of fatty acids involving AC as catalyst

| Entry | Feedstock    | Reactor     | Catalyst          | Conditions                      | H <sub>2</sub> O:Feedstock:Catalyst | Conversion | Selectivity                  | Reference      |
|-------|--------------|-------------|-------------------|---------------------------------|-------------------------------------|------------|------------------------------|----------------|
| 1     | Stearic acid | Micro-batch | AC-1 <sup>a</sup> | 370 °C<br>3 h                   | 50-144:10:3<br>15 mg catalyst       | 24 mol%    | 38 mol%<br>C <sub>17</sub>   | s <sup>2</sup> |
| 2     | Stearic acid | Micro-batch | AC-2 <sup>b</sup> | 370 °C<br>3 h                   | 50-144:10:3<br>15 mg catalyst       | 33 mol%    | 58 mol%<br>C <sub>18</sub>   | s <sup>2</sup> |
| 3     | Oleic acid   | Batch       | AC                | 400 °C<br>2 h                   | 4:1:-<br>5 g catalyst               | 97 mol%    | 81 mol%<br>C <sub>17</sub>   | s <sup>3</sup> |
| 4     | Oleic acid   | Continuous  | AC                | 400 °C<br>2 h                   | 4:1:-<br>0.4 g/mL catalyst          | 91 mol%    | 89.3 mol%<br>C <sub>17</sub> | s <sup>4</sup> |
| 5     | Oleic acid   | Continuous  | AC                | 370 °C<br>formic acid<br>0.35 h | 5:1:-<br>18.2 g catalyst            | 99.4 mol%  | 80.6 mol%<br>C <sub>17</sub> | s <sup>5</sup> |

a.AC-1 is an activated charcoal made via washing with phosphoric acid.

b.AC-2 was made from peat and was steam activated.

**Table S3.** HTDO process of lipids and fatty acids involving Pd-based catalyst

| Entry | Feedstock     | Reactor type | Catalyst     | Conditions                                        | H <sub>2</sub> O:Feedstock:Catalyst | Conversion | Selectivity                                    | Reference |
|-------|---------------|--------------|--------------|---------------------------------------------------|-------------------------------------|------------|------------------------------------------------|-----------|
| 1     | Palmitic acid | Micro-batch  | 5 wt% Pd/C   | 370 °C<br>3 h<br>autogenous pressure              | -:10:1<br>5 mg catalyst             | -          | 63 mol% C <sub>15</sub>                        | s1        |
| 2     | Stearic acid  | Batch        | 4.3 wt% Pd/C | 250 °C<br>20 h<br>autogenous pressure             | 100:4:1<br>0.25 g catalyst          | 13 mol%    | 100 mol% heptadecane                           | s6        |
| 3     | Tristearin    | Batch        | 4.3 wt% Pd/C | 250 °C<br>20 h<br>autogenous pressure             | 100:4:1<br>0.26 g catalyst          | 100 mol%   | 18 mol% heptadecane<br>82 mol% stearic acid    | s6        |
| 4     | Oleic acid    | Batch        | 4.3 wt% Pd/C | 250 °C<br>20 h<br>autogenous pressure             | 100:4:1<br>0.27 g catalyst          | 41 mol%    | 12.2 mol% heptadecane<br>7.3 mol% heptadecene  | s6        |
| 5     | Oleic acid    | Batch        | 4.3 wt% Pd/C | 250 °C<br>glycerol<br>20 h<br>autogenous pressure | 100:4:1<br>0.28 g catalyst          | 63 mol%    | 11.1 mol% heptadecane<br>11.1 mol% heptadecene | s6        |

|    |                    |            |              |                                                                         |                            |          |                                                      |    |
|----|--------------------|------------|--------------|-------------------------------------------------------------------------|----------------------------|----------|------------------------------------------------------|----|
| 6  | Triolein           | Batch      | 4.3 wt% Pd/C | 250 °C<br>20 h<br>autogenous pressure                                   | 100:4:1<br>0.29 g catalyst | 100 mol% | 9 mol% heptadecane<br>7 mol% heptadecene             | s6 |
| 7  | Triolein           | Batch      | 4.3 wt% Pd/C | 250 °C<br>methanol<br>20 h<br>autogenous pressure                       | 100:4:1<br>0.30 g catalyst | 100 mol% | 59 mol% heptadecane                                  | s6 |
| 8  | Crude Jatropha oil | Batch      | 5 wt% Pd/C   | 340 °C<br>1 g formic acid<br>4 h<br>atmospheric pressure N <sub>2</sub> | 10:10:1<br>0.3 g catalyst  | ~ 58 wt% | ~ 75 wt% paraffins<br>~ 10 wt% aromatic hydrocarbons | s7 |
| 9  | Crude Jatropha oil | Batch      | 5 wt% Pd/C   | 340 °C<br>3 g formic acid<br>4 h<br>atmospheric pressure N <sub>2</sub> | 10:10:1<br>0.3 g catalyst  | 99.5 wt% | 97 wt% hydrocarbons                                  | s7 |
| 10 | Crude Jatropha oil | Continuous | 5 wt% Pd/C   | 340 °C<br>20 ml/min N <sub>2</sub><br>feed rate 0.3 ml/min              | 3:2:-<br>5 g catalyst      | 99.5 wt% | 97 wt% hydrocarbon yield<br>~99 wt% n-heptadecane    | s7 |

---

|    |                       |       |            |                                                                                   |                            |          |                                                         |    |
|----|-----------------------|-------|------------|-----------------------------------------------------------------------------------|----------------------------|----------|---------------------------------------------------------|----|
| 11 | Crude Jatropha<br>oil | Batch | 5 wt% Pd/C | 260 °C<br>biphasic solvent:cycloalkane/water=2:22<br>28 bar H <sub>2</sub><br>6 h | 440:3:1<br>0.05 g catalyst | ~97.1 C% | 99 C% n-heptadecane<br>n-heptadecane carbon yield 91.7% | ss |
|----|-----------------------|-------|------------|-----------------------------------------------------------------------------------|----------------------------|----------|---------------------------------------------------------|----|

---



**Table S4.** HTDO process of lipids and fatty acids involving Pt-based catalyst

| Entry | Feedstock     | Reactor type | Catalyst        | Conditions                             | H <sub>2</sub> O:Feedstock:Catalyst | Conversion | Selectivity                      | Reference |
|-------|---------------|--------------|-----------------|----------------------------------------|-------------------------------------|------------|----------------------------------|-----------|
| 1     | Palmitic acid | Micro-batch  | 5 wt% Pt/C      | 370 °C<br>autogenous pressure<br>1 h   | -:10:1<br>5 mg catalyst             | -          | C <sub>15</sub> molar yield 76%  | S1        |
| 2     | Stearic acid  | Micro-batch  | 5 wt% Pt/C      | 330 °C<br>autogenous pressure<br>0.5 h | -:5:1<br>10 mg catalyst             | 52.4 mol%  | 57 mol%                          | S9        |
| 3     | Stearic acid  | Micro-batch  | 5 wt% Pt/MWCNTs | 330 °C<br>autogenous pressure<br>0.5 h | -:5:1<br>10 mg catalyst             | 52.4 mol%  | 97 mol%                          | S9        |
| 4     | Palm oil      | Batch        | Pt-Re/CNT       | 285 °C<br>1 MPa N <sub>2</sub><br>24 h | 87:22:1<br>0.92 g catalyst          | -          | n-paraffin carbon yield<br>72%   | S10       |
| 5     | Palm oil      | Batch        | Pt-Re/oCNT      | 285 °C<br>1 MPa N <sub>2</sub>         | 87:22:1<br>0.92 g catalyst          | -          | n-paraffin carbon yield<br>~ 58% | S10       |

|    |              |       |                  |                                                                            |                            |          |                                                                    |     |  |
|----|--------------|-------|------------------|----------------------------------------------------------------------------|----------------------------|----------|--------------------------------------------------------------------|-----|--|
|    |              |       |                  | 24 h                                                                       |                            |          |                                                                    |     |  |
| 6  | Palm oil     | Batch | Pt-Re/AC         | 285 °C<br>1 MPa N <sub>2</sub><br>24 h                                     | 87:22:1<br>0.92 g catalyst | -        | n-paraffin carbon yield<br>~ 40%                                   | S10 |  |
| 7  | Palm oil     | Batch | Pt-Re/oAC        | 285 °C<br>1 MPa N <sub>2</sub><br>24 h                                     | 87:22:1<br>0.92 g catalyst | -        | n-paraffin carbon yield<br>~ 10%                                   | S10 |  |
| 8  | Jatropha oil | Batch | 1 wt% Pt/H-ZSM-5 | 270 °C<br>H <sub>2</sub> /N <sub>2</sub> = 85/15 (vol %), 6.5 MPa.<br>12 h | 9:1:1<br>1 g catalyst      | 103.4 C% | 79.0 C% C <sub>15</sub> -C <sub>18</sub><br>8.68 C% gas products   | S11 |  |
| 9  | Jatropha oil | Batch | 1 wt% Pt/USY     | 270 °C<br>H <sub>2</sub> /N <sub>2</sub> = 85/15 (vol %), 6.5 MPa.<br>12 h | 9:1:1<br>1 g catalyst      | 31.2 C%  | 68.15 C% C <sub>15</sub> -C <sub>18</sub><br>11.53 C% gas products | S11 |  |
| 10 | Jatropha oil | Batch | 1 wt% Pt/CNTs    | 270 °C<br>H <sub>2</sub> /N <sub>2</sub> = 85/15 (vol %), 6.5 MPa.<br>12 h | 9:1:1<br>1 g catalyst      | 13.6 C%  | 23.73 C% C <sub>15</sub> -C <sub>18</sub><br>5.43 C% gas products  | S11 |  |

|    |               |             |                                      |                                                                           |                               |           |                                                                                                |     |
|----|---------------|-------------|--------------------------------------|---------------------------------------------------------------------------|-------------------------------|-----------|------------------------------------------------------------------------------------------------|-----|
| 11 | Stearic acid  | Micro-batch | Pt3Sn/C                              | 350 °C<br>2 h                                                             | 185:5680:1<br>5.4 mg catalyst | ~ 97 mol% | ~ 95 mol% C <sub>17</sub>                                                                      | S12 |
| 12 | Oleic acid    | Micro-batch | Pt3Sn/C                              | 350 °C<br>2 h                                                             | 185:5640:1<br>5.4 mg catalyst | ~ 98 mol% | ~ 53 mol% C <sub>17</sub>                                                                      | S12 |
| 13 | Oleic acid    | Batch       | Pt-Ni/Al <sub>2</sub> O <sub>3</sub> | 275 °C<br>0.1 MPa N <sub>2</sub><br>glycerol<br>4 h                       | 100 g oleic acid              | 100 mol%  | 69 mol% C <sub>17</sub>                                                                        | S13 |
| 14 | Jatropha Oils | Batch       | Pt/HZSM-5                            | 270 °C<br>H <sub>2</sub> /N <sub>2</sub> = 91/9 (vol %), 6.0 MPa.<br>12 h | 9:1:1<br>1 g catalyst         | ~ 14 C%   | ~ 13 C% C <sub>18</sub><br>~ 27 C% C <sub>19+</sub><br>~ 54 C% C <sub>1</sub> -C <sub>13</sub> | S11 |
| 15 | Jatropha Oils | Batch       | Pt-Re/HZSM-5                         | 270 °C<br>H <sub>2</sub> /N <sub>2</sub> = 91/9 (vol %), 6.0 MPa.<br>12 h | 9:1:1<br>1 g catalyst         | ~ 78 C%   | ~ 6 C% C <sub>19+</sub><br>~ 72 C% C <sub>18</sub>                                             | S11 |

|    |                     |       |         |                                                         |                            |           |                                                      |     |
|----|---------------------|-------|---------|---------------------------------------------------------|----------------------------|-----------|------------------------------------------------------|-----|
| 16 | Oleic acid          | Batch | Pt/C    | 300 °C<br>0.35MPa N <sub>2</sub><br>5 g glycerol<br>9 h | 160:40:1<br>0.5 g catalyst | 100 mol%  | 75 mol% stearic acid<br>24 mol% C <sub>17</sub>      | S14 |
| 17 | Oleic acid          | Batch | Pt-Re/C | 300 °C<br>0.35MPa N <sub>2</sub><br>5 g glycerol<br>9 h | 160:40:1<br>0.5 g catalyst | 92 mol%   | 53 mol% stearic acid<br>37 mol% C <sub>17</sub>      | S14 |
| 18 | Waste vegetable oil | Batch | Pt-Re/C | 300 °C<br>1.72 MPa H <sub>2</sub><br>6 h                | 40:10:1<br>2 g catalyst    | 100 wt%   | 81.3 wt% C <sub>17</sub><br>12.4 wt% C <sub>15</sub> | S15 |
| 19 | Animal fat          | Batch | Pt-Re/C | 300 °C<br>1.72 MPa H <sub>2</sub><br>6 h                | 40:10:1<br>2 g catalyst    | 100 wt%   | 56.3 wt% C <sub>17</sub><br>28.8 wt% C <sub>15</sub> | S15 |
| 20 | Coffee oil          | Batch | Pt-Re/C | 300 °C<br>1.72 MPa H <sub>2</sub><br>6 h                | 40:10:1<br>2 g catalyst    | 49.20 wt% | 30.7 wt% C <sub>17</sub><br>15.5 wt% C <sub>15</sub> | S15 |

**Table S5.** HTDO process of lipids and fatty acids involving Ru-based catalyst

| Entry | Feedstock        | Reactor type | Catalyst   | Conditions                                        | H <sub>2</sub> O:Feedstock:Catalyst | Conversion | Selectivity                                                  | Reference |
|-------|------------------|--------------|------------|---------------------------------------------------|-------------------------------------|------------|--------------------------------------------------------------|-----------|
| 1     | Stearic acid     | Batch        | 5 wt% Ru/C | 330 °C<br>2 MPa N <sub>2</sub><br>1 h             | 160:10:1<br>0.5 g catalyst          | 37.5 mol%  | 31.4 mol% liquid alkanes<br>3.4% carbon distribution in gas  | S16       |
| 2     | Commercial lipid | Batch        | 5 wt% Ru/C | 330 °C<br>2 MPa N <sub>2</sub><br>1 h             | 160:10:1<br>0.5 g catalyst          | 100 mol%   | 50.9 mol% liquid alkanes<br>7.7% carbon distribution in gas  | S16       |
| 3     | Stearic acid     | Batch        | 5 wt% Ru/C | 330 °C<br>2 MPa N <sub>2</sub><br>glycerol<br>1 h | 160:10:1<br>0.5 g catalyst          | 89.1 mol%  | 66.0 mol% liquid alkanes<br>24.7% carbon distribution in gas | S16       |
| 4     | Stearic acid     | Batch        | 5 wt% Ru/C | 330 °C<br>2 MPa H <sub>2</sub><br>1 h             | 160:10:1<br>0.5 g catalyst          | 95.6 mol%  | 67.3 mol% liquid alkanes<br>41.6% carbon distribution in gas | S16       |

|    |                 |       |                     |                                       |                            |           |                                                        |     |
|----|-----------------|-------|---------------------|---------------------------------------|----------------------------|-----------|--------------------------------------------------------|-----|
| 5  | Methyl stearate | Batch | 1 wt% Ru/HZSM-5     | 200 °C<br>3 MPa H <sub>2</sub><br>8 h | 200:4:3<br>0.15 g catalyst | 90.8 mol% | 64.3 mol% C <sub>17</sub><br>13.0 mol% C <sub>18</sub> | S17 |
| 6  | Stearic acid    | Batch | 1.7 wt% Ru/HAP      | 180 °C<br>2 MPa H <sub>2</sub><br>1h  | 750:14:5<br>0.1 g catalyst | 95.8 mol% | 60 mol% C <sub>17</sub><br>20.7 mol% C <sub>18</sub>   | S18 |
| 7  | Stearic acid    | Batch | Ru/AC               | 180 °C<br>2 MPa H <sub>2</sub><br>1h  | 375:7:-<br>0.005 g Ru      | 26.9 mol% | 3.1 mol% C <sub>17</sub><br>0.6 mol% C <sub>18</sub>   | S18 |
| 8  | Stearic acid    | Batch | Ru/HBEA             | 180 °C<br>2 MPa H <sub>2</sub><br>1h  | 375:7:-<br>0.005 g Ru      | 27.9 mol% | 0.4 mol% C <sub>17</sub><br>0.1 mol% C <sub>18</sub>   | S18 |
| 9  | Stearic acid    | Batch | Ru/SiO <sub>2</sub> | 180 °C<br>2 MPa H <sub>2</sub><br>1h  | 375:7:-<br>0.005 g Ru      | 42.7 mol% | 1 mol% C <sub>17</sub><br>0.1 mol% C <sub>18</sub>     | S18 |
| 10 | Stearic acid    | Batch | Ru/ZrO <sub>2</sub> | 180 °C<br>2 MPa H <sub>2</sub><br>1h  | 375:7:-<br>0.005 g Ru      | 41.7 mol% | 4.5 mol% C <sub>17</sub><br>0.3 mol% C <sub>18</sub>   | S18 |
| 11 | Stearic acid    | Batch | Ru/TiO <sub>2</sub> | 180 °C<br>2 MPa H <sub>2</sub>        | 375:7:-<br>0.005 g Ru      | 51.3 mol% | 38.4 mol% C <sub>17</sub><br>9.8 mol% C <sub>18</sub>  | S18 |

---

|    |              |       |                        |                      |                       |           |                                                      |     |
|----|--------------|-------|------------------------|----------------------|-----------------------|-----------|------------------------------------------------------|-----|
|    |              |       |                        | 1h                   |                       |           |                                                      |     |
|    |              |       |                        | 180 °C               |                       |           |                                                      |     |
| 12 | Stearic acid | Batch | Ru/La(OH) <sub>3</sub> | 2 MPa H <sub>2</sub> | 375:7:-<br>0.005 g Ru | 31.9 mol% | 6.5 mol% C <sub>17</sub><br>0.3 mol% C <sub>18</sub> | S18 |
|    |              |       |                        | 1h                   |                       |           |                                                      |     |

---

**Table S6.** HTDO process of lipids and fatty acids involving Ni-based catalyst

| Entry | Feedstock     | Reactor type       | Catalyst                   | Conditions                                                          | H <sub>2</sub> O:Feedstock:Catalyst | Conversion | Product yield                                                                                             | Reference |
|-------|---------------|--------------------|----------------------------|---------------------------------------------------------------------|-------------------------------------|------------|-----------------------------------------------------------------------------------------------------------|-----------|
| 1     | Palmitic acid | Mini-batch reactor | 5 wt% Ni/ZrO <sub>2</sub>  | 300 °C<br>0.69 MPa H <sub>2</sub><br>total pressure 5.52 MPa<br>6 h | 9:1:1<br>0.5 g catalyst             | 78 C%      | 44 C% paraffin<br>5.8 C% palmitone                                                                        | S19       |
| 2     | Palmitic acid | Mini-batch reactor | 10 wt% Ni/ZrO <sub>2</sub> | 300 °C<br>0.69 MPa H <sub>2</sub><br>total pressure 5.52 MPa<br>6 h | 9:1:1<br>0.5 g catalyst             | 88 C%      | 66 C% paraffin<br>0.15 C% palmitone<br>30.8 C% C <sub>8</sub> -C <sub>14</sub><br>16.1 C% CH <sub>4</sub> | S19       |
| 3     | Canola oil    |                    | 20 wt% Ni/C                | 305 °C<br>2.76 MPa H <sub>2</sub><br>6 h                            |                                     | ~32 wt%    | ~15 wt% hydrocarbons                                                                                      | S20       |
| 4     | Palmitic acid | Mini-batch reactor | 20 wt% Ni/ZrO <sub>2</sub> | 300 °C<br>0.69 MPa H <sub>2</sub><br>total pressure 5.52 MPa<br>6 h | 9:1:1<br>0.5 g catalyst             | 100 C%     | 66 C% paraffin                                                                                            | S20       |
| 5     | Palmitic acid | Mini-batch reactor | 10 wt% Ni/ZrO <sub>2</sub> | 250 °C<br>5.52 MPa H <sub>2</sub><br>6 h                            | 9:1:1<br>0.5 g catalyst             | ~5 C%      | 2.8 C% C <sub>15</sub>                                                                                    | S20       |



---

|    |               |                    |                            |                                                                     |                         |        |                                                                                                                           |     |
|----|---------------|--------------------|----------------------------|---------------------------------------------------------------------|-------------------------|--------|---------------------------------------------------------------------------------------------------------------------------|-----|
| 6  | Palmitic acid | Mini-batch reactor | 10 wt% Ni/ZrO <sub>2</sub> | 270 °C<br>5.52 MPa H <sub>2</sub><br>6 h                            | 9:1:1<br>0.5 g catalyst | ~22 C% | 18.9 C% C <sub>15</sub><br>0.8 C% C <sub>16</sub>                                                                         | S20 |
| 7  | Palmitic acid | Mini-batch reactor | 10 wt% Ni/ZrO <sub>2</sub> | 290 °C<br>5.52 MPa H <sub>2</sub><br>6 h                            | 9:1:1<br>0.5 g catalyst | ~97 C% | 34.6 C% C <sub>15</sub><br>4.0 C% C <sub>16</sub><br>21.4 C% C <sub>8</sub> -C <sub>14</sub>                              | S20 |
| 8  | Palmitic acid | Mini-batch reactor | 10 wt% Ni/ZrO <sub>2</sub> | 300 °C<br>5.52 MPa H <sub>2</sub><br>6 h                            | 9:1:1<br>0.5 g catalyst | 100 C% | 23.8 C% C <sub>15</sub><br>0.77 C% C <sub>16</sub><br>36.2 C% C <sub>8</sub> -C <sub>14</sub><br>~18.2 C% CH <sub>4</sub> | S20 |
| 9  | Palmitic acid | Mini-batch reactor | 10 wt% Ni/ZrO <sub>2</sub> | 300 °C<br>1.72 MPa H <sub>2</sub><br>total pressure 5.52 MPa<br>6 h | 9:1:1<br>0.5 g catalyst | ~92 C% | 30.2 C% C <sub>15</sub><br>2.8 C% C <sub>16</sub><br>26.0 C% C <sub>8</sub> -C <sub>14</sub><br>~18.3 C% CH <sub>4</sub>  | S20 |
| 10 | Palmitic acid | Mini-batch reactor | 10 wt% Ni/ZrO <sub>2</sub> | 300 °C<br>5.52 Mpa N <sub>2</sub><br>6 h                            | 9:1:1<br>0.5 g catalyst | ~63 C% | 16.1 C% C <sub>15</sub><br>0.4 C% C <sub>16</sub><br>22.1 C% C <sub>8</sub> -C <sub>14</sub><br>~11 C% CH <sub>4</sub>    | S20 |

---

|    |               |                     |                                         |                                                                   |          |            |  |                                                                                                     |     |
|----|---------------|---------------------|-----------------------------------------|-------------------------------------------------------------------|----------|------------|--|-----------------------------------------------------------------------------------------------------|-----|
|    |               |                     |                                         |                                                                   |          |            |  | 43.63 C% paraffin                                                                                   |     |
| 11 | Stearic acid  | Mini-batch reactor  | 20 wt% Ni/ZrO <sub>2</sub>              | 300 °C<br>6 h                                                     | 45:5:2   | 67.08%     |  | 29.90 C% C <sub>8</sub> -C <sub>16</sub><br>19.91 C% n-C <sub>17</sub><br>0.45 C% n-C <sub>18</sub> | S21 |
| 12 | Oleic acid    | Mini-batch reactor  | 20 wt% Ni/ZrO <sub>2</sub>              | 300 °C<br>6 h                                                     | 45:5:2   | -          |  | 28 C% stearic acid<br>42 C% paraffin                                                                | S21 |
| 13 | Bio-oil       | Mini-batch reactor  | 20 wt% Ni/ZrO <sub>2</sub>              | 300 °C<br>6 h                                                     | 45:5:2   | 55.39 wt%  |  | 31.33 wt% liquid paraffin<br>8.78 wt% total gas                                                     | S21 |
| 14 | Octanoic acid | Batch reactor       | 10 wt% Ni/Z450                          | 260 °C<br>water and decane system<br>3 MPa H <sub>2</sub><br>12 h | 6:2:1    | 99.10 mol% |  | 87.3 mol% heptane<br>8.3 mol% octane                                                                | S22 |
| 15 | Oleic acid    | Micro-batch reactor | 10 wt% NiMoC/Al-<br>SBA-15<br>Ni:Mo=2:1 | 400 °C<br>4 h                                                     | 321:22:5 | 32.80 mol% |  | 62.5 mol% heptadecene<br>3.1 mol% octadecene                                                        | S23 |
| 16 | Oleic acid    | Micro-batch reactor | 10 wt% NiNbC/Al-<br>SBA-15<br>Ni:Nb=2:1 | 400 °C<br>4 h                                                     | 321:22:5 | 30.70 mol% |  | 67.6 mol% heptadecene<br>1.9 mol% octadecene                                                        | S23 |

|    |             |                     |                                                            |                           |          |            |                                                                                                  |     |
|----|-------------|---------------------|------------------------------------------------------------|---------------------------|----------|------------|--------------------------------------------------------------------------------------------------|-----|
| 17 | Oleic acid  | Micro-batch reactor | 10 wt% NiWC/Al-SBA-15<br>Ni:W=2:1                          | 400 °C<br>4 h             | 321:22:5 | 30.70 mol% | 0.72 mol% heptadecane<br>53.6 mol% heptadecene<br>1.8 mol% octadecene                            | S23 |
| 18 | Oleic acid  | Micro-batch reactor | 10 wt% NiZrC/Al-SBA-15<br>Ni:Zr=2:1                        | 400 °C<br>4 h             | 321:22:5 | 30.10 mol% | 67.7 mol% heptadecene<br>1.1 mol% octadecene                                                     | S23 |
| 19 | Oleic acid  | Micro-batch reactor | 10 wt% NiNbC/Al-SBA-15<br>Ni:Nb=2:1                        | 400 °C<br>glycerol<br>4 h | 321:22:5 | ~ 80 mol%  | ~ 0.3 mol% heptadecane<br>~ 43 mol% heptadecene<br>~ 33 mol% stearic acid                        | S23 |
| 20 | Oleic acid  | Micro-batch reactor | 10 wt% NiWC/Al-SBA-15<br>Ni:W=2:1                          | 400 °C<br>glycerol<br>4 h | 321:22:5 | 97.30 mol% | 5.2 mol% heptadecane<br>~ 12 mol% heptadecene<br>~ 73 mol% stearic acid                          | S23 |
| 21 | Soybean oil | Micro-batch reactor | 10 wt% NiWC/Al-SBA-15<br>Ni:W=2:1                          | 400 °C<br>4 h             | 321:22:5 | >95 mol%   | 2.1 mol% heptadecane<br>19.7 mol% heptadecene<br>39.6 mol% stearic acid<br>15 mol% linoleic acid | S23 |
| 21 | Oleic acid  | Micro-batch reactor | 60 wt% Cu-Ni / Al <sub>2</sub> O <sub>3</sub><br>Cu:Ni=1:2 | 330 °C<br>methanol<br>1 h | 100:10:3 | 100 mol%   | 92.7 mol% heptadecane                                                                            | S24 |
| 22 | Oleic acid  | Micro-batch reactor | 30% Cu-Ni/ZrO <sub>2</sub>                                 | 370 °C<br>methanol<br>5 h | 100:10:3 | 100 mol%   | 92.5 mol% heptadecane                                                                            | S25 |

**Table S7.** HTDO process of lipids and fatty acids over other catalysts.

| Entry | Feedstock  | Reactor type | Catalyst                                  | Conditions    | H <sub>2</sub> O:Feedstock:Catalyst | Conversion/performance                                                 | Selectivity                                                                   | Reference |
|-------|------------|--------------|-------------------------------------------|---------------|-------------------------------------|------------------------------------------------------------------------|-------------------------------------------------------------------------------|-----------|
| 1     | Oleic acid | Continue     | 10 wt% MgO/Al <sub>2</sub> O <sub>3</sub> | 375 °C<br>4 h | 5:1:-<br>5 g catalyst               | 67% degree of DCX<br>65% liquid product yield<br>35% gas product yield | -                                                                             | S26       |
| 2     | Oleic acid | Continue     | 10 wt% Ni/Al <sub>2</sub> O <sub>3</sub>  | 375 °C<br>4 h | 5:1:-<br>5 g catalyst               | 65% degree of DCX<br>30% liquid product yield<br>70% gas product yield | -                                                                             | S26       |
| 3     | Oleic acid | Continue     | 10 wt% Mo/Al <sub>2</sub> O <sub>3</sub>  | 375 °C<br>4 h | 5:1:-<br>5 g catalyst               | 92% degree of DCX<br>71% liquid product yield<br>29% gas product yield | 34.8% tetradecane<br>24% pentadecane<br>22.9% hexadecane<br>18.3% heptadecane | S26       |
| 4     | Bio-oil    | Mini-batch   | Al-SBA-15                                 | 300 °C<br>1 h | 50:10:1                             | -                                                                      | 4.30 wt% aliphatic hydrocarbons<br>20.62 wt% aromatic hydrocarbons            | S27       |
| 5     | Bio-oil    | Mini-batch   | CuO/Al-SBA-15                             | 300 °C<br>1 h | 50:10:1                             | -                                                                      | 64.64 wt% aliphatic hydrocarbons<br>1.07 wt% aromatic hydrocarbons            | S27       |

---

|    |              |            |                                                 |                |         |        |                                                                    |     |
|----|--------------|------------|-------------------------------------------------|----------------|---------|--------|--------------------------------------------------------------------|-----|
| 6  | Bio-oil      | Mini-batch | ZnO/Al-SBA-15                                   | 300 °C<br>1 h  | 50:10:1 | -      | 61.13 wt% aliphatic hydrocarbons<br>3.14 wt% aromatic hydrocarbons | S27 |
| 7  | Bio-oil      | Mini-batch | (CuO-ZnO)/Al-SBA-15                             | 300 °C<br>1 h  | 50:10:1 | -      | 50.77 wt% aliphatic hydrocarbons<br>3.44 wt% aromatic hydrocarbons | S27 |
| 8  | Stearic acid | Batch      | Ce/ $\gamma$ -Al <sub>2</sub> O <sub>3</sub>    | 300 °C<br>12 h | 8:2:1   | 65 wt% | 54 wt% hydrocarbons                                                | S28 |
| 9  | Stearic acid | Batch      | Cu/ $\gamma$ -Al <sub>2</sub> O <sub>3</sub>    | 300 °C<br>12 h | 8:2:1   | 92 wt% | 72 wt% hydrocarbons                                                | S28 |
| 10 | Stearic acid | Batch      | Cu-Ce/ $\gamma$ -Al <sub>2</sub> O <sub>3</sub> | 300 °C<br>12 h | 8:2:1   | 95 wt% | 80 wt% hydrocarbons                                                | S28 |

---

## References

- S1. J. Fu, X. Y. Lu and P. E. Savage, *Energy Environ Sci*, 2010, **3**, 311-317.
- S2. J. Fu, F. Shi, L. T. Thompson, X. Y. Lu and P. E. Savage, *Acs Catal*, 2011, **1**, 227-231.
- S3. M. Z. Hossain, A. K. Jhavar, M. B. I. Chowdhury, W. Z. Xu, W. Wu, D. V. Hiscott and P. A. Charpentier, *Energy Fuels*, 2017, **31**, 4013-4023.
- S4. M. Z. Hossain, M. B. I. Chowdhury, A. K. Jhavar, W. Z. Xu and P. A. Charpentier, *Fuel*, 2018, **212**, 470-478.
- S5. S. Popov and S. Kumar, *Energy Fuels*, 2015, **29**, 3377-3384.
- S6. S. A. Hollak, M. A. Ariens, K. P. de Jong and D. S. van Es, *ChemSusChem*, 2014, **7**, 1057-1062.
- S7. S. Idesh, S. Kudo, K. Norinaga and J. Hayashi, *Energy Fuels*, 2013, **27**, 4796-4803.
- S8. S. Xie, C. Jia, A. Prakash, M. I. Palafox, J. Pfaendtner and H. Lin, *Acs Catal*, 2019, **9**, 3753-3763.
- S9. C. Y. Yang, R. F. Nie, J. Fu, Z. Y. Hou and X. Y. Lu, *Bioresour. Technol.*, 2013, **146**, 569-573.
- S10. M. Jin and M. Choi, *Mol Catal*, 2019, **474**, 1-9.
- S11. K. Murata, Y. Liu, M. Inaba and I. Takahara, *Energy Fuels*, 2010, **24**, 2404-2409.
- S12. T. M. Yeh, R. L. Hockstad, S. Linic and P. E. Savage, *Fuel*, 2015, **156**, 219-224.
- S13. V. Dominguez-Barroso, C. Herrera, M. Angeles Larrubia and L. J. Alemany, *Fuel Process. Technol.*, 2019, **190**, 21-28.
- S14. D. R. Vardon, B. K. Sharma, H. Jaramillo, D. Kim, J. K. Choe, P. N. Ciesielski and T. J. Strathmann, *Green Chem.*, 2014, **16**.
- S15. D. Kim, D. R. Vardon, D. Murali, B. K. Sharma and T. J. Strathmann, *ACS Sustain Chem Eng*, 2016, **4**, 1775-1784.
- S16. J. Zhang, X. Huo, Y. Li and T. J. Strathmann, *ACS Sustain Chem Eng*, 2019, **7**, 14400-14410.
- S17. J. Z. Chen and Q. Y. Xu, *Catal Sci Technol*, 2016, **6**, 7239-7251.
- S18. G. Xu, Y. Zhang, Y. Fu and Q. Guo, *Acs Catal*, 2017, **7**, 1158-1169.
- S19. C. Miao, O. Marin-Flores, S. D. Davidson, T. Li, T. Dong, D. Gao, Y. Wang, M. Garcia-Pérez and S. Chen, *Fuel*, 2016, **166**, 302-308.
- S20. R. U. Ndubuisi, S. Sinichi, Y. H. Chin and L. L. Diosady, *J. Am. Oil Chem. Soc.*, 2019, **96**, 535-543.
- S21. C. Miao, O. Marin-Flores, T. Dong, D. Gao, Y. Wang, M. Garcia-Perez and S. Chen, *ACS Sustain Chem Eng*, 2018, **6**, 4521-+.
- S22. H. Chen, Y. L. Wu, S. T. Qi, Y. Chen and M. D. Yang, *Appl Catal A-Gen*, 2017, **529**, 79-90.
- S23. B. Al Alwan, S. O. Salley and K. Y. S. Ng, *Appl Catal A-Gen*, 2015, **498**, 32-40.
- S24. Z. Zhang, Q. Yang, H. Chen, K. Chen, X. Lu, P. Ouyang, J. Fu and J. G. Chen, *Green Chem.*, 2018, **20**, 197-205.
- S25. Z. Zhang, H. Chen, C. Wang, K. Chen, X. Lu, P. Ouyang and J. Fu, *Fuel*, 2018, **230**, 211-217.

- S26. M. Z. Hossain, M. B. I. Chowdhury, A. K. Jhavar, W. Z. Xu, M. C. Biesinger and P. A. Charpentier, *Acs Omega*, 2018, **3**, 7046-7060.
- S27. J. Li, X. Fang, J. Bian, Y. Guo and C. Li, *Bioresour. Technol.*, 2018, **266**, 541-547.
- S28. Q. Yu, Z. Zhang, Z. Yin, S. Kong, Z. Yang, J. Chen and J. Zhang, *Chin J Chromatogr*, 2019, **37**, 454-461.
